# Supplementary material for: First principles study of photocatalytic activity in ZnO-Janus van der Waals heterostructures
Source: Royal Society of Chemistry journal article supplement (doi:10.1039/d4cp03691c), 2024-01-01
Supplement: d4cp03691c1.pdf [file d4cp03691c1.pdf]

# First principles study of photocatalytic activity in ZnO-Janus van der Waals heterostructures

## Supporting Information

Tahir Wahab,\* Antonio Cammarata,\* and Tomas Polcar

*Department of Control Engineering, Faculty of Electrical Engineering, Czech Technical  
University in Prague, Technicka 2, 16627 Prague 6, Czech Republic*

E-mail: [wahabtah@fel.cvut.cz](mailto:wahabtah@fel.cvut.cz); [cammaant@fel.cvut.cz](mailto:cammaant@fel.cvut.cz)

In the following sections, we report the optimized geometries of the considered monolayers and heterostructures in POSCAR format.

### Monolayer

1) ZnO

ZnO

```
1.0000000000000000
 3.2873909235949093  0.0000000000000000  0.0000000000000000
-1.6436954617474941  2.8469640519483885  0.0000000000000000
 0.0000000000000000  0.0000000000000000  25.0000000000000000
```

```
Zn  0
  1  1
```

Direct

```
0.6666616512168062  0.3332983043009534  0.5000000000000000
0.3333283647831919  0.6666316896990452  0.5000000000000000
```

2) VBrSe

VBrSe

```
1.0000000000000000
```

|                     |                    |                     |
|---------------------|--------------------|---------------------|
| 3.3257136161056637  | 0.0000000000000000 | 0.0000000000000000  |
| -1.6628568080528319 | 2.8801524773020297 | 0.0000000000000000  |
| 0.0000000000000000  | 0.0000000000000000 | 25.0000000000000000 |

V Br Se  
1 1 1

Direct

|                    |                    |                    |
|--------------------|--------------------|--------------------|
| 0.9777769941599601 | 0.9888884970799765 | 0.5319645984386909 |
| 0.3111078566306418 | 0.6555538983153184 | 0.5987465201023454 |
| 0.3111151732093944 | 0.6555575566046983 | 0.4687889424589642 |

### 3) VBrTe

VBrTe

|                     |                    |                     |
|---------------------|--------------------|---------------------|
| 1.0000000000000000  |                    |                     |
| 3.4584614553830213  | 0.0000000000000000 | 0.0000000000000000  |
| -1.7292307276418202 | 2.9951154783601348 | 0.0000000000000000  |
| 0.0000000000000000  | 0.0000000000000000 | 30.0000000000000000 |

Br V Te  
1 1 1

Direct

|                    |                    |                    |
|--------------------|--------------------|--------------------|
| 0.6666646600000021 | 0.3333318230000017 | 0.3192125553210303 |
| 0.3333308400000021 | 0.6666652560000017 | 0.3729001313975786 |
| 0.6666634680000030 | 0.3333318829999996 | 0.4324013272813900 |

### 4) VClSe

VClSe

|                     |                    |                     |
|---------------------|--------------------|---------------------|
| 1.0000000000000000  |                    |                     |
| 3.2258377479165077  | 0.0000000000000000 | 0.0000000000000000  |
| -1.6129188739582538 | 2.7936574381830481 | 0.0000000000000000  |
| 0.0000000000000000  | 0.0000000000000000 | 30.0000000000000000 |

V Cl Se  
1 1 1

Direct

|                    |                    |                    |
|--------------------|--------------------|--------------------|
| 0.3333308400000021 | 0.6666652560000017 | 0.3738854418515132 |
| 0.6666646600000021 | 0.3333318230000017 | 0.3228115574961521 |
| 0.6666634680000030 | 0.3333318829999996 | 0.4278170146523266 |

### 5) VCITe

VCITe

|                     |                    |                     |
|---------------------|--------------------|---------------------|
| 1.0000000000000000  |                    |                     |
| 3.3687814618436374  | 0.0000000000000000 | 0.0000000000000000  |
| -1.6843907309716419 | 2.9174503257725002 | 0.0000000000000000  |
| 0.0000000000000000  | 0.0000000000000000 | 30.0000000000000000 |

V Cl Te  
1 1 1

Direct

|                    |                    |                    |
|--------------------|--------------------|--------------------|
| 0.3333308400000021 | 0.6666652560000017 | 0.3709559759908316 |
| 0.6666646600000021 | 0.3333318230000017 | 0.3218994540114508 |
| 0.6666634680000030 | 0.3333318829999996 | 0.4316585839977165 |

# Heterostructures

1) ZnO-VBrSe (*m1*)

S1

ZnO-VBrSe

```
1.0000000000000000
 3.2823643802827078  0.0000000000000000  0.0000000000000000
-1.6411821901912773  2.8426109378690967  0.0000000000000000
 0.0000000000000000  0.0000000000000000  25.0000000000000000
```

```
Zn  O   V   Br  Se
 1   1   1   1   1
```

Direct

```
0.5796924780145218  0.1888606599644334  0.3341396953801805
0.9130128028222586  0.8555245735369610  0.3320556364326919
0.9098485445857847  0.8555699442044826  0.5166171274489884
0.2431544151028788  0.5222394188168025  0.5833789503638442
0.2431817724745500  0.5222364104773192  0.4533096373743035
```

S2

ZnO-VBrSe

```
1.0000000000000000
 3.2863179016722448  0.0000000000000000  0.0000000000000000
-1.6431589508861060  2.8460347878269219  0.0000000000000000
 0.0000000000000000  0.0000000000000000  25.0000000000000000
```

```
Zn  O   V   Br  Se
 1   1   1   1   1
```

Direct

```
0.1099611840071475  0.2553530021940773  0.3340016356986126
0.7766407263923796  0.5886813715845278  0.3314861498237391
0.7785344485149679  0.5890178525701870  0.5167945895353370
0.1118926065316330  0.2556954883614182  0.5835302500879180
0.1118610475538944  0.2556832922897811  0.4536884218544017
```

S3

ZnO-VBrSe

```
1.0000000000000000
 3.2847374713181758  0.0000000000000000  0.0000000000000000
-1.6423687357090477  2.8446660949913540  0.0000000000000000
 0.0000000000000000  0.0000000000000000  25.0000000000000000
```

```
Zn  O   V   Br  Se
 1   1   1   1   1
```

Direct

```
0.7765690157962339  0.5887475654780019  0.3353589917538073
0.4432424443035430  0.9220730430392834  0.3334440116066588
0.7785177989168020  0.5890014500396674  0.5157065902044380
0.1118670131938373  0.2556727229809681  0.5824889736626417
0.1118327727895831  0.2556682094620726  0.4525024797724626
```

S4

ZnO-VBrSe

1.0000000000000000  
3.2883068699440754 0.0000000000000000 0.0000000000000000  
-1.6441534350220515 2.8477572848776895 0.0000000000000000  
0.0000000000000000 0.0000000000000000 25.0000000000000000

Zn O V Br Se  
1 1 1 1 1

Direct

0.1101698244017086 0.2544658296302273 0.3345806345340492  
0.4435154092010691 0.9211501684730763 0.3322379779581581  
0.7783357099417003 0.5896228659008784 0.5163077607168844  
0.1116887364665260 0.2563086280394771 0.5830708591597684  
0.1116573499889952 0.2562755099563532 0.4533038146311483

S5

ZnO-VBrSe

1.0000000000000000  
3.2823687269181478 0.0000000000000000 0.0000000000000000  
-1.6411843635089973 2.8426147021658084 0.0000000000000000  
0.0000000000000000 0.0000000000000000 25.0000000000000000

Zn O V Br Se  
1 1 1 1 1

Direct

0.4429428337287646 0.9205534461173812 0.3341394511369771  
0.7762828966534698 0.5872314475252622 0.3320558798277631  
0.7787037343641146 0.5900033778712128 0.5166172147404211  
0.1120625849272727 0.2566954842500877 0.5833789090981014  
0.1120369953263918 0.2566702352360579 0.4533095921967316

S6

ZnO-VBrSe

1.0000000000000000  
3.2847875504408388 0.0000000000000000 0.0000000000000000  
-1.6423937752703799 2.8447094647837807 0.0000000000000000  
0.0000000000000000 0.0000000000000000 25.0000000000000000

Zn O V Br Se  
1 1 1 1 1

Direct

0.0446655094711232 0.7228735062693588 0.3353807090250243  
0.7113237288370229 0.0562043838794892 0.3334597212581301  
0.0442396596944761 0.7217941524931177 0.5156939908817293  
0.3775736844488762 0.3884543072241371 0.5824758532252616  
0.3775774485485073 0.3884706341338955 0.4524907726098348

2) ZnO-VBrSe (m2)

S1

ZnO-VBrSe

1.0000000000000000

|    |                     |                    |                     |
|----|---------------------|--------------------|---------------------|
|    | 3.2801657979987202  | 0.0000000000000000 | 0.0000000000000000  |
|    | -1.6400828990492502 | 2.8407069097588082 | 0.0000000000000000  |
|    | 0.0000000000000000  | 0.0000000000000000 | 25.0000000000000000 |
| Zn | 0                   | V                  | Br                  |
|    | 1                   | 1                  | 1                   |
| Se |                     |                    | 1                   |

Direct

|                    |                    |                    |
|--------------------|--------------------|--------------------|
| 0.5803259534603313 | 0.1885869969805682 | 0.3297903915372586 |
| 0.9136459763874996 | 0.8552542643447794 | 0.3294417381888834 |
| 0.9094220941225402 | 0.8557512752408130 | 0.5211483998099879 |
| 0.2427579604412600 | 0.5224184680652328 | 0.4545129558846526 |
| 0.2427380285883629 | 0.5224200023685981 | 0.5846075615792188 |

S2

ZnO-VBrSe

|                     |                    |                     |
|---------------------|--------------------|---------------------|
| 1.0000000000000000  |                    |                     |
| 3.2819862204436077  | 0.0000000000000000 | 0.0000000000000000  |
| -1.6409931102717217 | 2.8422834418417384 | 0.0000000000000000  |
| 0.0000000000000000  | 0.0000000000000000 | 25.0000000000000000 |
| Zn                  | 0                  | V                   |
|                     | 1                  | 1                   |
| Se                  |                    | 1                   |
| Br                  |                    |                     |
|                     |                    |                     |

Direct

|                    |                    |                    |
|--------------------|--------------------|--------------------|
| 0.1094515802304059 | 0.2557426973726677 | 0.3280740129243114 |
| 0.7761203756875616 | 0.5890593694110819 | 0.3278096216769057 |
| 0.7788795993047799 | 0.5887622248841708 | 0.5222230337341003 |
| 0.1122174267871046 | 0.2554273370922147 | 0.5856587239341522 |
| 0.1122210309901419 | 0.2554393782398563 | 0.4557356547305389 |

S3

ZnO-VBrSe

|                     |                    |                     |
|---------------------|--------------------|---------------------|
| 1.0000000000000000  |                    |                     |
| 3.2814628009051257  | 0.0000000000000000 | 0.0000000000000000  |
| -1.6407314005024729 | 2.8418301472245648 | 0.0000000000000000  |
| 0.0000000000000000  | 0.0000000000000000 | 25.0000000000000000 |
| Zn                  | 0                  | V                   |
|                     | 1                  | 1                   |
| Br                  |                    | 1                   |
| Se                  |                    |                     |
|                     |                    |                     |

Direct

|                    |                    |                    |
|--------------------|--------------------|--------------------|
| 0.7758157950507325 | 0.5883813860871712 | 0.3301973134505261 |
| 0.4424872610746320 | 0.9217091051839290 | 0.3299334953522646 |
| 0.7790273538793429 | 0.5892476427561348 | 0.5208154312326343 |
| 0.1123222957348418 | 0.2559036117165547 | 0.4542875870431757 |
| 0.1123763392604573 | 0.2559212452561894 | 0.5842672199214149 |

S4

ZnO-VBrSe

|                     |                    |                     |
|---------------------|--------------------|---------------------|
| 1.0000000000000000  |                    |                     |
| 3.2827430266326547  | 0.0000000000000000 | 0.0000000000000000  |
| -1.6413715133662568 | 2.8429388552272092 | 0.0000000000000000  |
| 0.0000000000000000  | 0.0000000000000000 | 25.0000000000000000 |

| Zn | O | V | Br | Se |
|----|---|---|----|----|
| 1  | 1 | 1 | 1  | 1  |

Direct

|                    |                    |                    |
|--------------------|--------------------|--------------------|
| 0.1113210023418176 | 0.2552279673331626 | 0.3281298452013601 |
| 0.4446343774363086 | 0.9218847658032914 | 0.3279466518777738 |
| 0.7775770966140456 | 0.5891233602789185 | 0.5221359328023070 |
| 0.1109259970156202 | 0.2557966229913902 | 0.4557146246200858 |
| 0.1109085565922356 | 0.2557902855932426 | 0.5855739924984817 |

S5

ZnO-VBrSe

|                     |                    |                     |
|---------------------|--------------------|---------------------|
| 1.0000000000000000  |                    |                     |
| 3.2801673949768544  | 0.0000000000000000 | 0.0000000000000000  |
| -1.6400836975383173 | 2.8407082927824421 | 0.0000000000000000  |
| 0.0000000000000000  | 0.0000000000000000 | 25.0000000000000000 |

| Zn | O | V | Br | Se |
|----|---|---|----|----|
| 1  | 1 | 1 | 1  | 1  |

Direct

|                    |                    |                    |
|--------------------|--------------------|--------------------|
| 0.4416712904835620 | 0.9197509644532573 | 0.3297909465802462 |
| 0.7750171907742498 | 0.5864302499742493 | 0.3294419673484015 |
| 0.7795525019413887 | 0.5905416720666352 | 0.5211481901372892 |
| 0.1128839401891994 | 0.2572059484604523 | 0.4545127459908045 |
| 0.1129041216115994 | 0.2572251560454006 | 0.5846071969432529 |

S6

ZnO-VBrSe

|                     |                    |                     |
|---------------------|--------------------|---------------------|
| 1.0000000000000000  |                    |                     |
| 3.2815099068031395  | 0.0000000000000000 | 0.0000000000000000  |
| -1.6407549534514800 | 2.8418709421289132 | 0.0000000000000000  |
| 0.0000000000000000  | 0.0000000000000000 | 25.0000000000000000 |

| Zn | O | V | Br | Se |
|----|---|---|----|----|
| 1  | 1 | 1 | 1  | 1  |

Direct

|                    |                    |                    |
|--------------------|--------------------|--------------------|
| 0.0446639908611388 | 0.7228136995491994 | 0.3302216669956763 |
| 0.7113250710156720 | 0.0561459092060943 | 0.3299511795309087 |
| 0.0442396517880610 | 0.7218324665228479 | 0.5208012331918823 |
| 0.3775796508588627 | 0.3885121203038722 | 0.4542747032700802 |
| 0.3775716664762712 | 0.3884927884179916 | 0.5842522640114538 |

3) ZnO-VBrTe (*m1*)

S1

ZnO-VBrTe

|                     |                    |                     |
|---------------------|--------------------|---------------------|
| 1.0000000000000000  |                    |                     |
| 3.3414308170305245  | 0.0000000000000000 | 0.0000000000000000  |
| -1.6702252177014167 | 2.8929149372261094 | 0.0000000000000000  |
| 0.0000000000000000  | 0.0000000000000000 | 25.0000000000000000 |

| Zn | O | V | Br | Te |
|----|---|---|----|----|
| 1  | 1 | 1 | 1  | 1  |

Direct

|                    |                    |                    |
|--------------------|--------------------|--------------------|
| 0.1757453486071867 | 0.7872177821777768 | 0.3271921260663291 |
| 0.5092160100050052 | 0.4540139451274356 | 0.3256462281129942 |
| 0.5123855085348126 | 0.4565889969942418 | 0.5246552095436385 |
| 0.8457832379283872 | 0.1233130031418455 | 0.5897782326352043 |
| 0.8457599079246165 | 0.1232972795587060 | 0.4522292506418353 |

S2

ZnO-VBrTe

|                     |                    |                     |    |    |
|---------------------|--------------------|---------------------|----|----|
| 1.0000000000000000  |                    |                     |    |    |
| 3.3449348263076262  | 0.0000000000000000 | 0.0000000000000000  |    |    |
| -1.6724674131538131 | 2.8967985335993016 | 0.0000000000000000  |    |    |
| 0.0000000000000000  | 0.0000000000000000 | 25.0000000000000000 |    |    |
| Zn                  | O                  | V                   | Br | Te |
| 1                   | 1                  | 1                   | 1  | 1  |

Direct

|                    |                    |                    |
|--------------------|--------------------|--------------------|
| 0.1141439038954033 | 0.2574064664224380 | 0.3263438428174155 |
| 0.7807390552196836 | 0.5906987470463108 | 0.3246240901287436 |
| 0.7757876724326422 | 0.5876695694694831 | 0.5252116767654584 |
| 0.1090866997662232 | 0.2543129502363684 | 0.5903085012815410 |
| 0.1091326816860558 | 0.2543432738253912 | 0.4530129360068429 |

S3

ZnO-VBrTe

|                     |                    |                     |    |    |
|---------------------|--------------------|---------------------|----|----|
| 1.0000000000000000  |                    |                     |    |    |
| 3.3432558181368286  | 0.0000000000000000 | 0.0000000000000000  |    |    |
| -1.6716279090684143 | 2.8953444698702229 | 0.0000000000000000  |    |    |
| 0.0000000000000000  | 0.0000000000000000 | 25.0000000000000000 |    |    |
| Zn                  | O                  | V                   | Br | Te |
| 1                   | 1                  | 1                   | 1  | 1  |

Direct

|                    |                    |                    |
|--------------------|--------------------|--------------------|
| 0.7810048381516239 | 0.5909094528058674 | 0.3268363554594842 |
| 0.4476157891519961 | 0.9242111892777913 | 0.3255208616446552 |
| 0.7755724701717384 | 0.5875654926481033 | 0.5247610527911348 |
| 0.1088797403842534 | 0.2542137655746828 | 0.5899091219250465 |
| 0.1089562071404089 | 0.2542630906935415 | 0.4524736551796735 |

S4

ZnO-VBrTe

|                     |                    |                     |    |    |
|---------------------|--------------------|---------------------|----|----|
| 1.0000000000000000  |                    |                     |    |    |
| 3.3468694639848291  | 0.0000000000000000 | 0.0000000000000000  |    |    |
| -1.6734347319924145 | 2.8984739789748857 | 0.0000000000000000  |    |    |
| 0.0000000000000000  | 0.0000000000000000 | 25.0000000000000000 |    |    |
| Zn                  | O                  | V                   | Br | Te |
| 1                   | 1                  | 1                   | 1  | 1  |

Direct

|                    |                    |                    |
|--------------------|--------------------|--------------------|
| 0.1141603100861559 | 0.2576752860613496 | 0.3261736059468348 |
| 0.4474372090835885 | 0.9243061733476168 | 0.3246110501973405 |

0.7757001821212413 0.5875026728105013 0.5252294316803727  
 0.1090071398347874 0.2541500926284428 0.5903506036262769  
 0.1090621888742405 0.2541887771521019 0.4531363555491836

S5

ZnO-VBrTe

1.0000000000000000  
 3.3409127338736679 0.0000000000000000 0.0000000000000000  
 -1.6704563669368340 2.8933152993751081 0.0000000000000000  
 0.0000000000000000 0.0000000000000000 25.0000000000000000

Zn O V Br Te  
 1 1 1 1 1

Direct

0.4470108537805402 0.9243520192281309 0.3271873343842273  
 0.7802907823834175 0.5909773023775600 0.3256407930798488  
 0.7760305894830708 0.5875055534472438 0.5246587117275183  
 0.1093277046719905 0.2541427544970247 0.5897820556506801  
 0.1093691146809945 0.2541763614500425 0.4522321521577410

S6

ZnO-VBrTe

1.0000000000000000  
 3.3432326728383206 0.0000000000000000 0.0000000000000000  
 -1.6716163364191603 2.8953244254537363 0.0000000000000000  
 0.0000000000000000 0.0000000000000000 25.0000000000000000

Zn O V Br Te  
 1 1 1 1 1

Direct

0.6425693833152764 0.3213191469042371 0.3268302813591433  
 0.3092652501925954 0.6546674471813034 0.3255147968474787  
 0.6456323451908190 0.3228286824939630 0.5247649999960231  
 0.9789751483111786 0.9895002375260731 0.5899138377991022  
 0.9789379039901362 0.9894814698944288 0.4524771309982611

4) ZnO-VBrTe (*m2*)

S1

ZnO-VBrTe

1.0000000000000000  
 3.3384971780265125 0.0000000000000000 0.0000000000000000  
 -1.6692485890132562 2.8912233666472020 0.0000000000000000  
 0.0000000000000000 0.0000000000000000 25.0000000000000000

Zn O V Br Te  
 1 1 1 1 1

Direct

0.1752768312803070 0.7867673360049707 0.3295166409730896  
 0.5086353393588894 0.4534549888859871 0.3290531749525698  
 0.5127631413439957 0.4569530829439046 0.5177853651606696  
 0.8461034385089334 0.1236230928302362 0.4528271419819916  
 0.8461112625078755 0.1236325063349142 0.5903187239316594



S2

ZnO-VBrTe

```
1.0000000000000000
 3.3404331610690488  0.0000000000000000  0.0000000000000000
-1.6702165805345244  2.8928999771433421  0.0000000000000000
 0.0000000000000000  0.0000000000000000  25.0000000000000000
Zn  O   V   Te  Br
 1   1   1   1   1
```

Direct

```
0.1157425620375108  0.2572515737246093  0.3278370535512565
0.7823506963067359  0.5905692225313004  0.3274289239039518
0.7747116790752528  0.5877606218577967  0.5188343186282154
0.1080292795899496  0.2544261180824066  0.5913519452392393
0.1080557959905306  0.2544234708038857  0.4540488056773313
```

S3

ZnO-VBrTe

```
1.0000000000000000
 3.3413948298055085  0.0000000000000000  0.0000000000000000
-1.6706974149027543  2.8937328066991452  0.0000000000000000
 0.0000000000000000  0.0000000000000000  24.7589959576437337
Zn  O   V   Br  Te
 1   1   1   1   1
```

Direct

```
0.1154047562246703  0.2573604789125952  0.3270050008940544
0.4486885650940309  0.9240061052855353  0.3266854338996552
0.7748577065281523  0.5877045139359822  0.5193037958335651
0.1082429368649258  0.2543872667121150  0.4539750157606477
0.1081730652882413  0.2543646371537918  0.5925318006120790
```

S4

ZnO-VBrTe

```
1.0000000000000000
 3.3414003996456825  0.0000000000000000  0.0000000000000000
-1.6707001998228412  2.8937376303222311  0.0000000000000000
 0.0000000000000000  0.0000000000000000  25.0000000000000000
Zn  O   V   Br  Te
 1   1   1   1   1
```

Direct

```
0.1154150214130496  0.2572548779547930  0.3281565533111177
0.4486919009854020  0.9239045838454629  0.3278343815241413
0.7748520023430743  0.5877721288088296  0.5185618638239333
0.1082420757609981  0.2544591612601081  0.4538643393328812
0.1081660294974824  0.2544322501308045  0.5910839090079349
```

S5

ZnO-VBrTe

```
1.0000000000000000
```

|                     |                    |                     |
|---------------------|--------------------|---------------------|
| 3.3384581755317915  | 0.0000000000000000 | 0.0000000000000000  |
| -1.6692290877658957 | 2.8911895894959621 | 0.0000000000000000  |
| 0.0000000000000000  | 0.0000000000000000 | 25.0000000000000000 |

|    |   |   |    |    |
|----|---|---|----|----|
| Zn | O | V | Te | Br |
| 1  | 1 | 1 | 1  | 1  |

Direct

|                    |                    |                    |
|--------------------|--------------------|--------------------|
| 0.4478189453306385 | 0.9245370771877788 | 0.3295080466639533 |
| 0.7811164576246199 | 0.5911812047566798 | 0.3290430517578002 |
| 0.7754850287589647 | 0.5873742321918556 | 0.5177918217460515 |
| 0.1087970015637651 | 0.2540257671911021 | 0.5903259048532092 |
| 0.1088116117220324 | 0.2540357096725714 | 0.4528322219789942 |

S6

ZnO-VBrTe

|                     |                    |                     |
|---------------------|--------------------|---------------------|
| 1.0000000000000000  |                    |                     |
| 3.3398910887269251  | 0.0000000000000000 | 0.0000000000000000  |
| -1.6699455443634625 | 2.8924305287243719 | 0.0000000000000000  |
| 0.0000000000000000  | 0.0000000000000000 | 25.0000000000000000 |

|    |   |   |    |    |
|----|---|---|----|----|
| Zn | O | V | Br | Te |
| 1  | 1 | 1 | 1  | 1  |

Direct

|                    |                    |                    |
|--------------------|--------------------|--------------------|
| 0.6425024053848389 | 0.3212716760826737 | 0.3302108110700814 |
| 0.3091930838107544 | 0.6546171907080236 | 0.3298567525277818 |
| 0.6456830266906763 | 0.3228634669788235 | 0.5172352310888115 |
| 0.9789739253258318 | 0.9895088578918632 | 0.4524200129620795 |
| 0.9790275897878971 | 0.9895357923386143 | 0.5897782393512472 |

5) ZnO-VClSe *m1*

S1

ZnO-VClSe

|                     |                    |                     |
|---------------------|--------------------|---------------------|
| 1.0000000000000000  |                    |                     |
| 3.2451470394214770  | 0.0000000000000000 | 0.0000000000000000  |
| -1.6225735196609143 | 2.8103797751762607 | 0.0000000000000000  |
| 0.0000000000000000  | 0.0000000000000000 | 25.0000000000000000 |

|    |   |   |    |    |
|----|---|---|----|----|
| Zn | O | V | Se | Cl |
| 1  | 1 | 1 | 1  | 1  |

Direct

|                    |                    |                    |
|--------------------|--------------------|--------------------|
| 0.3760826713826404 | 0.3925063526634673 | 0.3342909137619969 |
| 0.7094403334544026 | 0.0591211073545637 | 0.3319646922281194 |
| 0.0455679077301454 | 0.7198189481618300 | 0.5188073202421108 |
| 0.3788821606298285 | 0.3865238978254979 | 0.4548414331924846 |
| 0.3789169398029983 | 0.3864607009946681 | 0.5795966875752754 |

S2

ZnO-VClSe

|                     |                    |                    |
|---------------------|--------------------|--------------------|
| 1.0000000000000000  |                    |                    |
| 3.2434908864122529  | 0.0000000000000000 | 0.0000000000000000 |
| -1.6217454431563278 | 2.8089455045977072 | 0.0000000000000000 |

```

0.0000000000000000 0.0000000000000000 25.0000000000000000
Zn  O   V   Se  Cl
 1   1   1   1   1
Direct
0.1072269009311526 0.2526682826376501 0.3339400518075166
0.7739505219156797 0.5860442158778909 0.3314244799203152
0.7803433108240583 0.5907916467310415 0.5191420546536349
0.1136531963518479 0.2574415159383676 0.4550899785098750
0.1137160829772697 0.2574853458150343 0.5799044821086667

```

S3

```

ZnO-VClSe
1.0000000000000000
 3.2419670048266882 0.0000000000000000 0.0000000000000000
-1.6209835023635693 2.8076257844322394 0.0000000000000000
0.0000000000000000 0.0000000000000000 25.0000000000000000
Zn  O   V   Se  Cl
 1   1   1   1   1
Direct
0.7736386888542910 0.5857614182580093 0.3350767369354060
0.4403512959783598 0.9191309399103673 0.3331121505411758
0.7804692511688245 0.5909884472619424 0.5182116374908858
0.1137341084697709 0.2576027185517376 0.4540780194118952
0.1138357005287531 0.2576794670179154 0.5790225026206386

```

S4

```

ZnO-VClSe
1.0000000000000000
 3.2451666593142776 0.0000000000000000 0.0000000000000000
-1.6225833296073144 2.8103967665018450 0.0000000000000000
0.0000000000000000 0.0000000000000000 25.0000000000000000
Zn  O   V   Cl  Se
 1   1   1   1   1
Direct
0.1070524146291874 0.2522783377726299 0.3343012263041487
0.4404414356159165 0.9189916640486899 0.3319717618040414
0.7804052893150484 0.5910765674625011 0.5188014518363175
0.1137730235833416 0.2577690649607831 0.5795902642242083
0.1136948668565267 0.2577073677554012 0.4548363428312925

```

S5

```

ZnO-VClSe
1.0000000000000000
 3.2401552841037051 0.0000000000000000 0.0000000000000000
-1.6200776420021052 2.8060567882615608 0.0000000000000000
0.0000000000000000 0.0000000000000000 25.0000000000000000
Zn  O   V   Se  Cl
 1   1   1   1   1

```

Direct

|                    |                    |                    |
|--------------------|--------------------|--------------------|
| 0.4398123657952979 | 0.9184515898475638 | 0.3342804739615843 |
| 0.7731897121042053 | 0.5851541400042990 | 0.3321146017341903 |
| 0.7807732721058969 | 0.5913954824836694 | 0.5188443156558407 |
| 0.1141020819471592 | 0.2580584383873159 | 0.4546271979184198 |
| 0.1141516130474258 | 0.2580943402771538 | 0.5796344577299806 |

S6

ZnO-VClSe

|                     |                    |                     |    |    |
|---------------------|--------------------|---------------------|----|----|
| 1.0000000000000000  |                    |                     |    |    |
| 3.2420135180207295  | 0.0000000000000000 | 0.0000000000000000  |    |    |
| -1.6210067589605890 | 2.8076660660398902 | 0.0000000000000000  |    |    |
| 0.0000000000000000  | 0.0000000000000000 | 25.0000000000000000 |    |    |
| Zn                  | O                  | V                   | Se | Cl |
| 1                   | 1                  | 1                   | 1  | 1  |

Direct

|                    |                    |                    |
|--------------------|--------------------|--------------------|
| 0.0433684957503218 | 0.7255397259768301 | 0.3351034281696954 |
| 0.7100482103202026 | 0.0588349019785710 | 0.3331331119240772 |
| 0.0451013293352958 | 0.7200203015566728 | 0.5181955513323473 |
| 0.3784159948320607 | 0.3867400956848286 | 0.4540630931455141 |
| 0.3784460007621462 | 0.3866619588031099 | 0.5790058624283674 |

6) ZnO-VClSe *m2*

S1

ZnO-VClSe

|                     |                    |                     |    |    |
|---------------------|--------------------|---------------------|----|----|
| 1.0000000000000000  |                    |                     |    |    |
| 3.2385498632178189  | 0.0000000000000000 | 0.0000000000000000  |    |    |
| -1.6192749315591868 | 2.8046664529906065 | 0.0000000000000000  |    |    |
| 0.0000000000000000  | 0.0000000000000000 | 25.0000000000000000 |    |    |
| Zn                  | O                  | V                   | Se | Cl |
| 1                   | 1                  | 1                   | 1  | 1  |

Direct

|                    |                    |                    |
|--------------------|--------------------|--------------------|
| 0.5811049450530419 | 0.1882699331585087 | 0.3336681778822381 |
| 0.9144203421731163 | 0.8549409206850243 | 0.3332772040696881 |
| 0.9089018715779176 | 0.8559617564602817 | 0.5162848009246233 |
| 0.2422189190607114 | 0.5226289415491223 | 0.5806137405466600 |
| 0.2422439351352352 | 0.5226294551470900 | 0.4556571235767848 |

S2

ZnO-VClSe

|                     |                    |                     |    |    |
|---------------------|--------------------|---------------------|----|----|
| 1.0000000000000000  |                    |                     |    |    |
| 3.2399736037827092  | 0.0000000000000000 | 0.0000000000000000  |    |    |
| -1.6199868018416101 | 2.8058994484882089 | 0.0000000000000000  |    |    |
| 0.0000000000000000  | 0.0000000000000000 | 25.0000000000000000 |    |    |
| Zn                  | O                  | V                   | Se | Cl |
| 1                   | 1                  | 1                   | 1  | 1  |

Direct

|                    |                    |                    |
|--------------------|--------------------|--------------------|
| 0.1052312186581972 | 0.2509060065971909 | 0.3319437095540252 |
|--------------------|--------------------|--------------------|

|                    |                    |                    |
|--------------------|--------------------|--------------------|
| 0.7719392036128383 | 0.5842715586158960 | 0.3316725533684703 |
| 0.7816863444616189 | 0.5919753152443477 | 0.5173608605173143 |
| 0.1150365632143746 | 0.2586552827232182 | 0.5816758193214540 |
| 0.1149966830529792 | 0.2586228438193388 | 0.4568481042387447 |

S3

ZnO-VClSe

|                     |                    |                     |
|---------------------|--------------------|---------------------|
| 1.0000000000000000  |                    |                     |
| 3.2392598121903142  | 0.0000000000000000 | 0.0000000000000000  |
| -1.6196299060454236 | 2.8052812868361827 | 0.0000000000000000  |
| 0.0000000000000000  | 0.0000000000000000 | 25.0000000000000000 |

|    |   |   |    |    |
|----|---|---|----|----|
| Zn | O | V | Se | Cl |
| 1  | 1 | 1 | 1  | 1  |

Direct

|                    |                    |                    |
|--------------------|--------------------|--------------------|
| 0.7729792810549370 | 0.5852006761100839 | 0.3344444564013713 |
| 0.4396795190032634 | 0.9185612828848804 | 0.3341198837112955 |
| 0.7809276521569970 | 0.5913764701942554 | 0.5157160846310376 |
| 0.1142841556938308 | 0.2580631747141311 | 0.5800462441861924 |
| 0.1141584370909712 | 0.2579613870966284 | 0.4551743780701187 |

S4

ZnO-VClSe

|                     |                    |                     |
|---------------------|--------------------|---------------------|
| 1.0000000000000000  |                    |                     |
| 3.2403438511737654  | 0.0000000000000000 | 0.0000000000000000  |
| -1.6201719255371325 | 2.8062200921345513 | 0.0000000000000000  |
| 0.0000000000000000  | 0.0000000000000000 | 25.0000000000000000 |

|    |   |   |    |    |
|----|---|---|----|----|
| Zn | O | V | Se | Cl |
| 1  | 1 | 1 | 1  | 1  |

Direct

|                    |                    |                    |
|--------------------|--------------------|--------------------|
| 0.1054633964599319 | 0.2510389111675764 | 0.3321301744983316 |
| 0.4388344251409038 | 0.9177371131181715 | 0.3319527523325831 |
| 0.7814835330242857 | 0.5919181413131724 | 0.5171882118045303 |
| 0.1148323961105149 | 0.2585983204964393 | 0.5815082211388969 |
| 0.1147532792643773 | 0.2585305159046598 | 0.4567216872256523 |

S5

ZnO-VClSe

|                     |                    |                     |
|---------------------|--------------------|---------------------|
| 1.0000000000000000  |                    |                     |
| 3.2385511061919070  | 0.0000000000000000 | 0.0000000000000000  |
| -1.6192755530462306 | 2.8046675294377432 | 0.0000000000000000  |
| 0.0000000000000000  | 0.0000000000000000 | 25.0000000000000000 |

|    |   |   |    |    |
|----|---|---|----|----|
| Zn | O | V | Se | Cl |
| 1  | 1 | 1 | 1  | 1  |

Direct

|                    |                    |                    |
|--------------------|--------------------|--------------------|
| 0.4404879204636316 | 0.9188906756412436 | 0.3336629601774561 |
| 0.7738413175278893 | 0.5855748573056374 | 0.3332724558074176 |
| 0.7803411557883635 | 0.5911156719063584 | 0.5162880683821172 |
| 0.1136921853347062 | 0.2577988393192143 | 0.5806172174758260 |
| 0.1136664658854087 | 0.2577739468275482 | 0.4556603451571917 |

S6

ZnO-VClSe

```

1.0000000000000000
  3.2392606622903890    0.0000000000000000    0.0000000000000000
 -1.6196303310954610    2.8052820230444433    0.0000000000000000
  0.0000000000000000    0.0000000000000000    25.0000000000000000
Zn  O    V    Se    Cl
  1    1    1    1    1

```

Direct

```

0.0426465472216435    0.7267067875721835    0.3344444837203326
0.7093265938115962    0.0600074741862002    0.3341201709587125
0.0455877015212351    0.7192258251357373    0.5157159237867504
0.3789338708199921    0.3858654986096255    0.5800459925812191
0.3788853176255387    0.3859913984962304    0.4551744759530010

```

7) ZnO-VClTe ml  
S1

ZnO-VClTe

```

1.0000000000000000
  3.3002729336267271    0.0000000000000000    0.0000000000000000
 -1.6501364667637810    2.8581201999302839    0.0000000000000000
  0.0000000000000000    0.0000000000000000    25.0000000000000000
Zn  O    V    Cl    Te
  1    1    1    1    1

```

Direct

```

0.1788112034538045    0.7901345856197111    0.3272422752912476
0.5121372454644941    0.4567844780086432    0.3257222917871871
0.5104261036556395    0.4547279658094325    0.5269101171397566
0.8437553151956294    0.1213879694796773    0.5860255948341404
0.8437601452304264    0.1213960080825345    0.4536007679476981

```

S2

ZnO-VClTe

```

1.0000000000000000
  3.3036711105836685    0.0000000000000000    0.0000000000000000
 -1.6518355552422008    2.8610631075015367    0.0000000000000000
  0.0000000000000000    0.0000000000000000    25.0000000000000000
Zn  O    V    Cl    Te
  1    1    1    1    1

```

Direct

```

0.1120456190371044    0.2567462791157880    0.3263288190583182
0.7786949691073772    0.5900545770434178    0.3246658337528388
0.7771631663837724    0.5881011231874993    0.5275112727734310
0.1104805498589059    0.2547516167722677    0.5865997220013597
0.1105057086128340    0.2547774108810188    0.4543953994140395

```

S3

ZnO-VClTe

1.0000000000000000  
3.3021077894245829 0.0000000000000000 0.0000000000000000  
-1.6510538946626816 2.8597092316635009 0.0000000000000000  
0.0000000000000000 0.0000000000000000 25.0000000000000000

Zn O V Te Cl  
1 1 1 1 1

Direct

0.7776577062977310 0.5898491790363636 0.3266014204461314  
0.4443209126245407 0.9231655698050290 0.3252935771933849  
0.7777949195917273 0.5882686719587156 0.5272210790936427  
0.1111340027199077 0.2549534758900833 0.4540304866886018  
0.1111215037661140 0.2549260943097948 0.5863544835782619

S4

ZnO-VClTe

1.0000000000000000  
3.3051050941430877 0.0000000000000000 0.0000000000000000  
-1.6525525470218889 2.8623049736925972 0.0000000000000000  
0.0000000000000000 0.0000000000000000 25.0000000000000000

Zn O V Cl Te  
1 1 1 1 1

Direct

0.1139550361888269 0.2570162403551919 0.3258386394694739  
0.4472454516195228 0.9236641460794317 0.3243517831071827  
0.7758311811681722 0.5879356378037528 0.5277438687455884  
0.1091382635163427 0.2545856434957159 0.5868568536222867  
0.1091970975071419 0.2546213342659058 0.4547099020554768

S5

ZnO-VClTe

1.0000000000000000  
3.3002629290215162 0.0000000000000000 0.0000000000000000  
-1.6501314644611762 2.8581115356880171 0.0000000000000000  
0.0000000000000000 0.0000000000000000 25.0000000000000000

Zn O V Cl Te  
1 1 1 1 1

Direct

0.4454446539258967 0.9224960301850516 0.3272344581936864  
0.7787522865164291 0.5891538951013899 0.3257168725418325  
0.7770568068418982 0.5887235880352790 0.5269144582347067  
0.1103770854685919 0.2553853662617129 0.5860305936575614  
0.1103982122471763 0.2553951114165613 0.4536046643722145

S6

ZnO-VClTe

1.0000000000000000  
3.3036492080261688 0.0000000000000000 0.0000000000000000

```

-1.6518246039634517    2.8610441393303345    0.0000000000000000
0.0000000000000000    0.0000000000000000    25.0000000000000000
Zn  O   V   Te  Cl
1   1   1   1   1
Direct
0.8434039093279750    0.1213791384365948    0.3263140981867139
0.5100900887671358    0.4547302630642491    0.3246541963033422
0.5117378097706293    0.4561166374071064    0.5275203927824776
0.8450614315626339    0.1227773189693551    0.4544032689132749
0.8450867915716387    0.1227936261227072    0.5866090908141999

```

8) ZnO-VClTe *m2*  
S1

```

ZnO-VClTe
1.0000000000000000
3.2985186579526546    0.0000000000000000    0.0000000000000000
-1.6492593289267714    2.8566009526313030    0.0000000000000000
0.0000000000000000    0.0000000000000000    25.0000000000000000
Zn  O   V   Cl  Te
1   1   1   1   1
Direct
0.1774664393122833    0.7904791003817948    0.3331233028562082
0.5108027552005296    0.4571315524198312    0.3326389634794467
0.5113168585354515    0.4544981493174589    0.5130909205147276
0.8446598450006917    0.1211703584576398    0.4541798590676223
0.8446441149510449    0.1211518464232668    0.5864680010819825

```

S2

```

ZnO-VClTe
1.0000000000000000
3.3002621260165035    0.0000000000000000    0.0000000000000000
-1.6501310629586696    2.8581108402652764    0.0000000000000000
0.0000000000000000    0.0000000000000000    25.0000000000000000
Zn  O   V   Te  Cl
1   1   1   1   1
Direct
0.1112022538696920    0.2572523470571539    0.3317530262837209
0.7778678866895987    0.5905655837346657    0.3313136069295197
0.7777175772678362    0.5877592352878054    0.5139479536548137
0.1110589285956394    0.2544240590328428    0.5873086463088200
0.1110433665772206    0.2544297818875094    0.4551778138231484

```

S3

```

ZnO-VClTe
1.0000000000000000
3.2993017126626629    0.0000000000000000    0.0000000000000000
-1.6496508562817633    2.8572790979027198    0.0000000000000000
0.0000000000000000    0.0000000000000000    25.0000000000000000

```



| Zn | O | V | Cl | Te |
|----|---|---|----|----|
| 1  | 1 | 1 | 1  | 1  |

Direct

|                    |                    |                    |
|--------------------|--------------------|--------------------|
| 0.7778413305108458 | 0.5900170385385408 | 0.3342457904470493 |
| 0.4445042288818186 | 0.9233350187238258 | 0.3338136002258878 |
| 0.7776712170864784 | 0.5881526366788350 | 0.5122856995559530 |
| 0.1110005618604362 | 0.2548414683854148 | 0.4534866545188052 |
| 0.1110117066604204 | 0.2548168286733770 | 0.5856693022522990 |

S4

ZnO-VClTe

|                     |                    |                     |
|---------------------|--------------------|---------------------|
| 1.0000000000000000  |                    |                     |
| 3.3007108423003344  | 0.0000000000000000 | 0.0000000000000000  |
| -1.6503554211005789 | 2.8584994399661636 | 0.0000000000000000  |
| 0.0000000000000000  | 0.0000000000000000 | 25.0000000000000000 |

| Zn | O | V | Cl | Te |
|----|---|---|----|----|
| 1  | 1 | 1 | 1  | 1  |

Direct

|                    |                    |                    |
|--------------------|--------------------|--------------------|
| 0.1128051327123174 | 0.2559286420745792 | 0.3321105865474010 |
| 0.4461224961307551 | 0.9225961307617112 | 0.3317633235768724 |
| 0.7765859605710830 | 0.5886542803428085 | 0.5136582725388479 |
| 0.1099350638159038 | 0.2553186364567779 | 0.4549425600603669 |
| 0.1099183767699543 | 0.2553253123641213 | 0.5870263042764989 |

S5

ZnO-VClTe

|                     |                    |                     |
|---------------------|--------------------|---------------------|
| 1.0000000000000000  |                    |                     |
| 3.2985194267685189  | 0.0000000000000000 | 0.0000000000000000  |
| -1.6492597133347038 | 2.8566016184453731 | 0.0000000000000000  |
| 0.0000000000000000  | 0.0000000000000000 | 25.0000000000000000 |

| Zn | O | V | Te | Cl |
|----|---|---|----|----|
| 1  | 1 | 1 | 1  | 1  |

Direct

|                    |                    |                    |
|--------------------|--------------------|--------------------|
| 0.4475460250679006 | 0.9237514919374661 | 0.3331314627468771 |
| 0.7808502383195091 | 0.5904057967048715 | 0.3326469641966483 |
| 0.7756614257396919 | 0.5878909133978354 | 0.5130854050690488 |
| 0.1089848657410997 | 0.2545568212508442 | 0.5864620567950709 |
| 0.1089864901317981 | 0.2545489677089705 | 0.4541751581923563 |

S6

ZnO-VClTe

|                     |                    |                     |
|---------------------|--------------------|---------------------|
| 1.0000000000000000  |                    |                     |
| 3.3002734751471259  | 0.0000000000000000 | 0.0000000000000000  |
| -1.6501367375239808 | 2.8581206689007059 | 0.0000000000000000  |
| 0.0000000000000000  | 0.0000000000000000 | 25.0000000000000000 |

| Zn | O | V | Cl | Te |
|----|---|---|----|----|
| 1  | 1 | 1 | 1  | 1  |

Direct

|                    |                    |                    |
|--------------------|--------------------|--------------------|
| 0.8442075800852322 | 0.1209855685959695 | 0.3317450173065808 |
| 0.5108796157914526 | 0.4543320233771979 | 0.3313080625581719 |
| 0.5112083702226116 | 0.4563819025790750 | 0.5139524640319380 |
| 0.8445469435784858 | 0.1230457305782906 | 0.4551824048402864 |
| 0.8445375213222306 | 0.1230517588694653 | 0.5873130982630244 |

Here in the following, we report the optimised geometries of the configurations with the least binding energy without including van der Waals corrections.

ZnO-VBrSe *m1*

ZnO-VBrSe

|                     |                    |                     |    |    |
|---------------------|--------------------|---------------------|----|----|
| 1.0000000000000000  |                    |                     |    |    |
| 3.3096157453812713  | 0.0000000000000000 | 0.0000000000000000  |    |    |
| -1.6548078727409739 | 2.8662113123328155 | 0.0000000000000000  |    |    |
| 0.0000000000000000  | 0.0000000000000000 | 25.1690154779090491 |    |    |
| Zn                  | O                  | V                   | Br | Se |
| 1                   | 1                  | 1                   | 1  | 1  |

Direct

|                    |                    |                    |
|--------------------|--------------------|--------------------|
| 0.1143422806149843 | 0.2566461164608285 | 0.3256149205236341 |
| 0.4476460529218187 | 0.9233029415132989 | 0.3244753027138216 |
| 0.7755669543132981 | 0.5881775112315779 | 0.5219073252174056 |
| 0.1088859370463950 | 0.2548419092373777 | 0.5884307662247750 |
| 0.1089258051034889 | 0.2548545235569293 | 0.4590727323203510 |

ZnO-VBrSe *m2*

ZnO-VBrSe

|                     |                    |                     |    |    |
|---------------------|--------------------|---------------------|----|----|
| 1.0000000000000000  |                    |                     |    |    |
| 3.3046163040775838  | 0.0000000000000000 | 0.0000000000000000  |    |    |
| -1.6523081520890537 | 2.8618816691589908 | 0.0000000000000000  |    |    |
| 0.0000000000000000  | 0.0000000000000000 | 25.1309956516712099 |    |    |
| Zn                  | O                  | V                   | Br | Se |
| 1                   | 1                  | 1                   | 1  | 1  |

Direct

|                    |                    |                    |
|--------------------|--------------------|--------------------|
| 0.4378082705926403 | 0.9171236268422547 | 0.3086502790841124 |
| 0.7711429750738006 | 0.5837899046948039 | 0.3089593211831385 |
| 0.7821341219609010 | 0.5923006181298973 | 0.5351389924620804 |
| 0.1154749274220848 | 0.2589714880376448 | 0.4685160453893573 |
| 0.1154687499505798 | 0.2589683532954083 | 0.5982364088813057 |

ZnO-VBrTe *m1*

ZnO-VBrTe

|                     |                    |                     |    |    |
|---------------------|--------------------|---------------------|----|----|
| 1.0000000000000000  |                    |                     |    |    |
| 3.3709537315992630  | 0.0000000000000000 | 0.0000000000000000  |    |    |
| -1.6854768657996315 | 2.9193315665606265 | 0.0000000000000000  |    |    |
| 0.0000000000000000  | 0.0000000000000000 | 24.9780208760687614 |    |    |
| Zn                  | O                  | V                   | Br | Te |
| 1                   | 1                  | 1                   | 1  | 1  |

Direct

|                    |                    |                    |
|--------------------|--------------------|--------------------|
| 0.1090963710160295 | 0.2528123369293951 | 0.3175059224762578 |
|--------------------|--------------------|--------------------|

|                    |                    |                    |
|--------------------|--------------------|--------------------|
| 0.7757894737914057 | 0.5861820518154630 | 0.3166508323108559 |
| 0.7791118921002465 | 0.5906998542902500 | 0.5308188956601256 |
| 0.1124570312752198 | 0.2573833341875016 | 0.5961896690587238 |
| 0.1124352448171351 | 0.2573534297773961 | 0.4583357274940383 |

ZnO-VBrTe *m2*

ZnO-VBrTe

|                     |                    |                     |
|---------------------|--------------------|---------------------|
| 1.0000000000000000  |                    |                     |
| 3.3669100881166765  | 0.0000000000000000 | 0.0000000000000000  |
| -1.6834550440583382 | 2.9158296685808422 | 0.0000000000000000  |
| 0.0000000000000000  | 0.0000000000000000 | 24.9480583730605936 |

|    |   |   |    |    |
|----|---|---|----|----|
| Zn | O | V | Br | Te |
| 1  | 1 | 1 | 1  | 1  |

Direct

|                    |                    |                    |
|--------------------|--------------------|--------------------|
| 0.1079054103490833 | 0.2510804293972626 | 0.3123552745390867 |
| 0.4412441793233910 | 0.9177555683427840 | 0.3124078323824619 |
| 0.7798535608672381 | 0.5918887862877256 | 0.5291282864316926 |
| 0.1131731455507108 | 0.2585372903420549 | 0.4637531708597109 |
| 0.1131907339096045 | 0.2585609276301781 | 0.6018564827870634 |

ZnO-VClSe *m1*

ZnO-VClSe

|                     |                    |                     |
|---------------------|--------------------|---------------------|
| 1.0000000000000000  |                    |                     |
| 3.2637096686333269  | 0.0000000000000000 | 0.0000000000000000  |
| -1.6318548342665546 | 2.8264554836348759 | 0.0000000000000000  |
| 0.0000000000000000  | 0.0000000000000000 | 25.0545026278471319 |

|    |   |   |    |    |
|----|---|---|----|----|
| Zn | O | V | Se | Cl |
| 1  | 1 | 1 | 1  | 1  |

Direct

|                    |                    |                    |
|--------------------|--------------------|--------------------|
| 0.1058965329122827 | 0.2514198154862228 | 0.3220014699960174 |
| 0.7725822111754752 | 0.5847673726530260 | 0.3211107610759640 |
| 0.7812454416419499 | 0.5916349031106947 | 0.5265599648561192 |
| 0.1145649871606977 | 0.2582911528803109 | 0.4624585993268795 |
| 0.1146008401095955 | 0.2583177628697300 | 0.5873702517450354 |

ZnO-VClSe *m2*

ZnO-VClSe

|                     |                    |                     |
|---------------------|--------------------|---------------------|
| 1.0000000000000000  |                    |                     |
| 3.2610148334184741  | 0.0000000000000000 | 0.0000000000000000  |
| -1.6305074166591695 | 2.8241216878797828 | 0.0000000000000000  |
| 0.0000000000000000  | 0.0000000000000000 | 25.0338152007083039 |

|    |   |   |    |    |
|----|---|---|----|----|
| Zn | O | V | Se | Cl |
| 1  | 1 | 1 | 1  | 1  |

Direct

|                    |                    |                    |
|--------------------|--------------------|--------------------|
| 0.7708697377008846 | 0.5833550867923805 | 0.3087058728746612 |
| 0.4375383267844484 | 0.9166895149022807 | 0.3089192692819935 |
| 0.7823193661116363 | 0.5925964196192268 | 0.5328363692382112 |
| 0.1156540796206400 | 0.2592638802848342 | 0.5970680710009333 |
| 0.1156475347824042 | 0.2592580894012784 | 0.4719714646041950 |

ZnO-VClTe *m1*

ZnO-VClTe

```
1.0000000000000000
 3.3279094429714022  0.0000000000000000  0.0000000000000000
-1.6639547214357036  2.8820541190945925  0.0000000000000000
 0.0000000000000000  0.0000000000000000  24.9987192620690593
Zn  O  V  Cl  Te
 1  1  1  1  1
```

Direct

```
0.1140092899172416  0.2580544557803606  0.3163860636531481
0.7806533877764750  0.5913689292180351  0.3157156959733882
0.7758550662615846  0.5872259836100540  0.5338213568872376
0.1091698540873907  0.2538771257893728  0.5930747379076209
0.1092024149573092  0.2539045126021691  0.4605031925786065
```

ZnO-VClTe *m2*

ZnO-VClTe

```
1.0000000000000000
 3.3241454280889196  0.0000000000000000  0.0000000000000000
-1.6620727139945191  2.8787943865861552  0.0000000000000000
 0.0000000000000000  0.0000000000000000  24.9704445890474851
Zn  O  V  Cl  Te
 1  1  1  1  1
```

Direct

```
0.7849570450026917  0.5911361882474822  0.3110634294305044
0.4516208876126981  0.9244693296765902  0.3110482033478732
0.7729256389713086  0.5874079883126626  0.5277302478893446
0.1062689486116284  0.2540746308101873  0.4684134473891888
0.1062565248016796  0.2540748539530711  0.6012457189430975
```
